# Supplementary material
Source: PubMed Central journal article supplement (PMC9044977)
Supplement: ehp10092.smcontents.508.pdf [file ehp10092.smcontents.508.pdf]

**Note to readers with disabilities:** *EHP* strives to ensure that all journal content is accessible to all readers. However, some figures and Supplemental Material published in *EHP* articles may not conform to [508 standards](#) due to the complexity of the information being presented. If you need assistance accessing journal content, please contact [ehp508@niehs.nih.gov](mailto:ehp508@niehs.nih.gov). Our staff will work with you to assess and meet your accessibility needs within 3 working days.

### **Supplemental Material**

#### **Exposure to per- and Polyfluoroalkyl Substances and Markers of Liver Injury: A Systematic Review and Meta-Analysis**

Elizabeth Costello, Sarah Rock, Nikos Stratakis, Sandrah P. Eckel, Douglas I. Walker, Damaskini Valvi, Dora Cserbik, Todd Jenkins, Stavra A. Xanthakos, Rohit Kohli, Stephanie Sisley, Vasilis Vasiliou, Michele A. La Merrill, Hugo Rosen, David V. Conti, Rob McConnell, and Leda Chatzi

#### **Table of Contents**

##### **Description of domains in Office of Health Assessment and Translation (OHAT) Risk of Bias tool**

##### **Review articles screened for additional eligible articles**

**Table S1.** Assessment of study quality by the OHAT approach (human studies).

**Table S2.** Assessment of study quality by the OHAT approach (animal studies).

**Table S3.** Weighted Z-scores for the cross-sectional associations of PFAS with ALT and GGT in humans with selected exclusions.

**Table S4.** Weighted Z-scores for the cross-sectional associations of PFAS with GGT and AST in humans  $\geq 12$  years old.

**Figure S1.** Strip plots for PFOA and AST in animal studies. Blue triangles indicate a significant increase in AST and red diamonds indicate a significant decrease in AST relative to control. Circles indicate no significant change in AST relative to control.

**Figure S2.** Strip plots for PFOA and relative liver weight in animal studies. Blue triangles indicate a significant increase in relative liver weight relative to control. Circles indicate no significant change in relative liver weight relative to control. Plots are ordered by species and strain.

**Figure S3.** Strip plots for PFOS and AST in animal studies. Blue triangles indicate a significant increase in AST and red diamonds indicate a significant decrease in AST relative to control. Circles indicate no significant change in AST relative to control. Plots are ordered by species and strain.

**Figure S4.** Strip plots for PFOS and relative liver weight in animal studies. Blue triangles indicate a significant increase in relative liver weight relative to control. Black dots indicate no significant change in relative liver weight relative to control. Plots are ordered by species and strain.

**Table S5.** Results for PFOA and ALT in animal studies.

**Table S6.** Results for PFOS and ALT in rodent studies.

**Table S7.** Results for PFOA and AST in animal studies.

**Table S8.** Results for PFOA and relative liver weight in animal studies.

**Table S9.** Results for PFOS and AST in animal studies.

**Table S10.** Results for PFOS and relative liver weight in animal studies.

## **References**

**Additional File-** Excel Document
